# Supplementary material for: Profiling of humoral immune responses to norovirus in children across Europe
Source: bioRxiv or medRxiv preprint supplement (doi:10.1101/2022.02.04.22270402), 2022-02-05
Supplement: Supplementary file [file media-1.pdf]

## Supplementary material

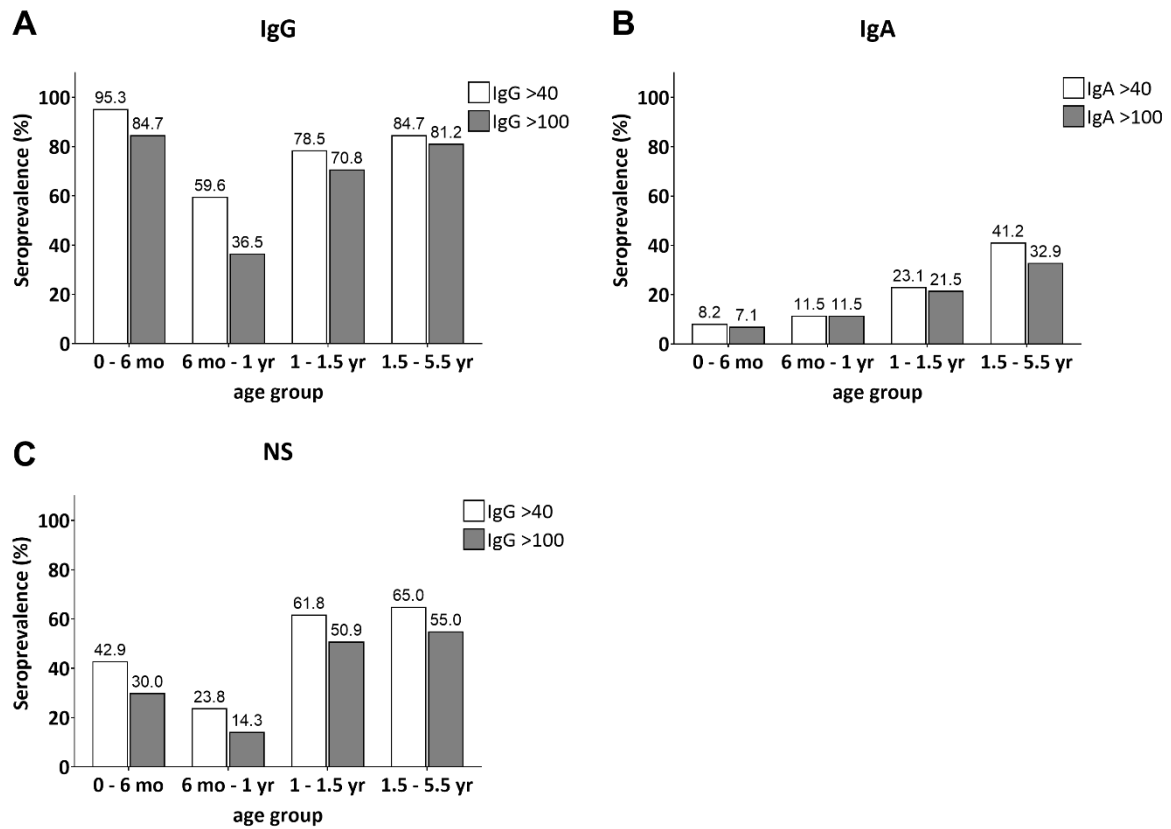

Supplementary Figure S1. Norovirus seroprevalence in four age groups with a cutoff of >40 and >100 for titers to be considered positive (A) IgG (B) IgA (C) IgG against NS proteins. Mo=months, yr=years

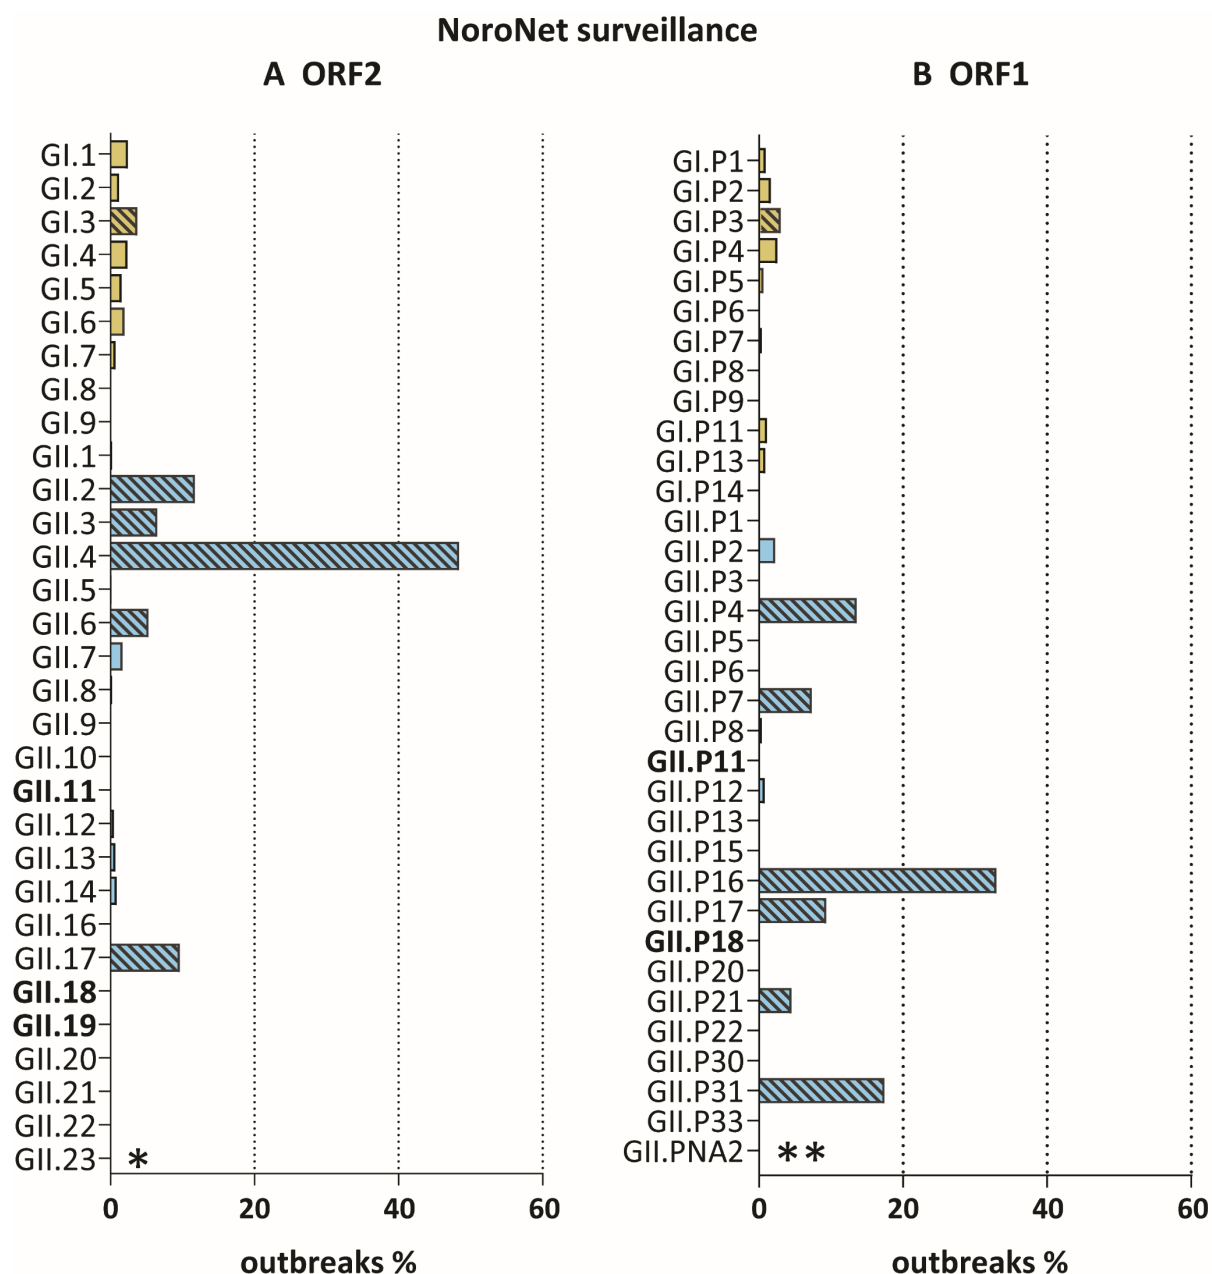

Supplementary Figure S2. NoroNet data from outbreaks in Europe between 2016 and 2019. Prevalence of (A) ORF2 and (B) ORF1 genotypes detected in outbreaks. \*GII.23 is not listed in NoroNet as a genotype yet. \*\*GII.pNA2 is not included in the NoroNet database. The genotypes most commonly reported during outbreaks are marked with a pattern. In bold are the porcine genotypes. The numbers of outbreaks for each ORF1 and OR2 genotypes were extracted separately from NoroNet with a sample collection date between 1.1.2016 and 31.12.2019. Data were extracted on the 8.7.2021.
